# Supplementary material
Source: Springer Nature journal article supplement (https://www.springermedizin.de/resource/supplementary/13024_2014_552_MOESM3_ESM.pdf/9644382)

■ **Tauopathy:**

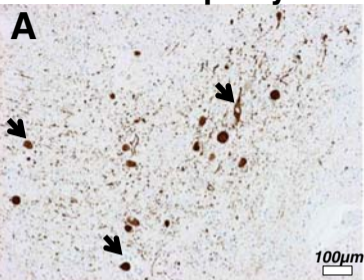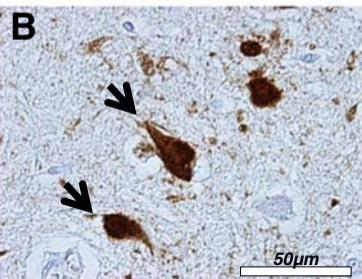

■ **Synucleinopathy:**

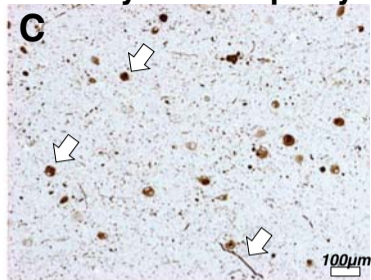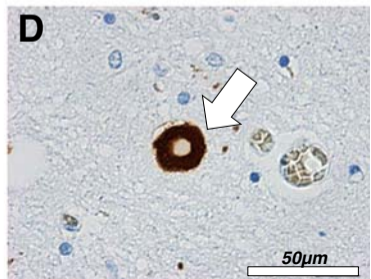

Supplement: MOESM3 [file 9644382]
